# Supplementary material for: Single reactor deposition of silicon/tungsten oxide core–shell heterostructure nanowires with controllable structure and optical properties
Source: Royal Society of Chemistry journal article supplement (doi:10.1039/c4ra13257b), 2014-12-01
Supplement: c4ra13257b1.pdf [file c4ra13257b1.pdf]

Supplementary Information for

Single reactor deposition of silicon/tungsten oxide  
core-shell heterostructure nanowires with  
controllable structure and optical properties

*Su Kong Chong<sup>1\*</sup>, Chang Fu Dee<sup>2</sup>, Saadah Abdul Rahman<sup>1\*</sup>*

<sup>1</sup>Low Dimensional Materials Research Centre, Department of Physics, University of Malaya,  
50603 Kuala Lumpur, Malaysia.

<sup>2</sup>Institute of Microengineering and Nanoelectronics (IMEN), Universiti Kebangsaan Malaysia  
(UKM), Bangi, Selangor, Malaysia.

**Corresponding Author**

\*Email address: sukong1985@yahoo.com.my, saadah@um.edu

---

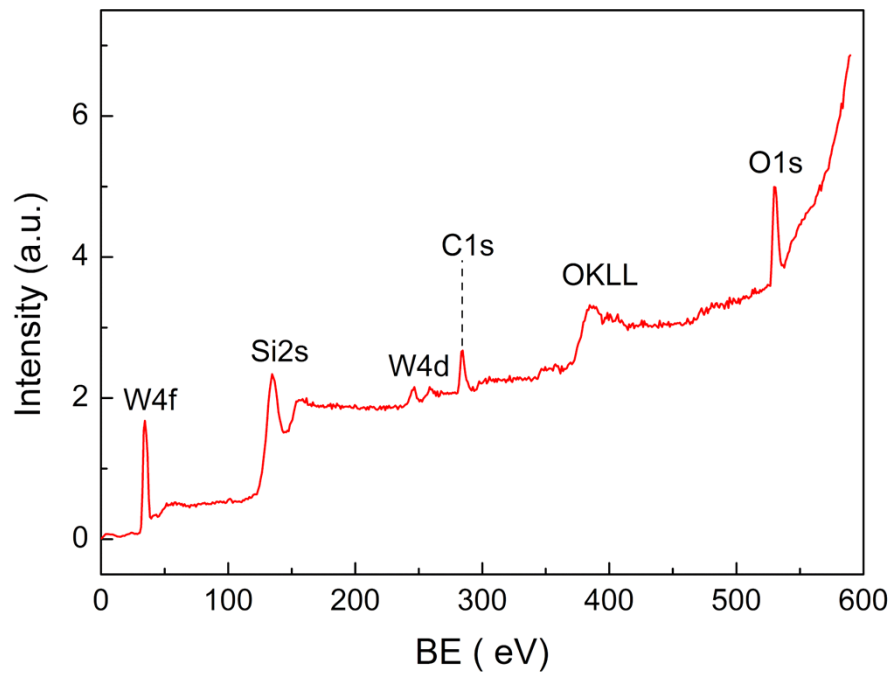

Figure S1 typical XPS spectrum of the Si/WO<sub>3</sub> core-shell NWs.

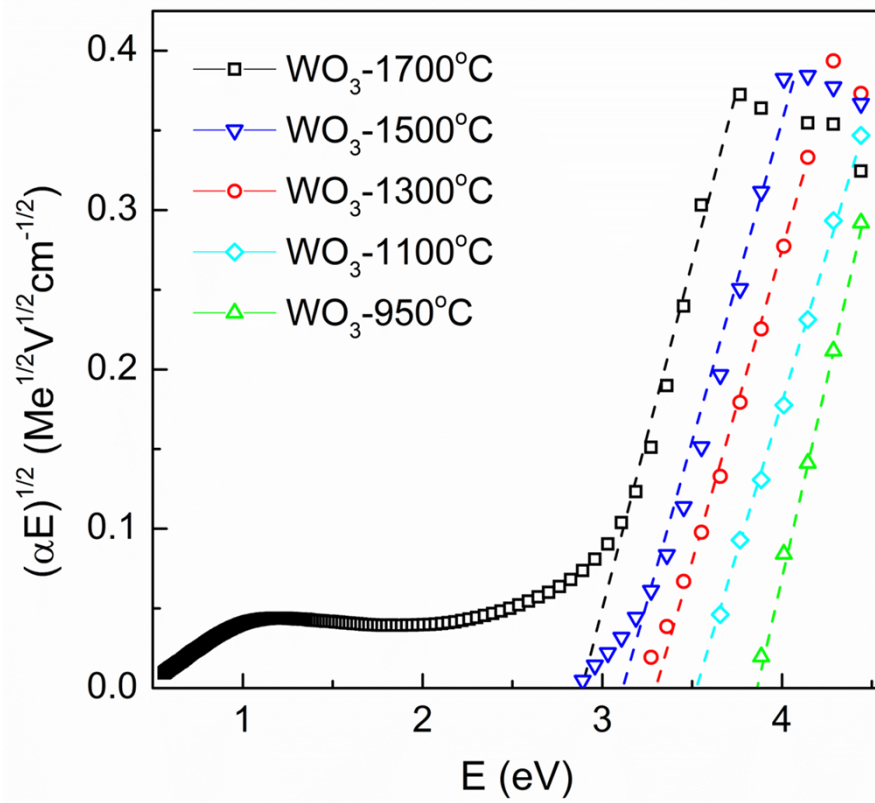

Figure S2 Tauc's plots of the  $\text{WO}_3$  thin films prepared at different  $T_f$ .

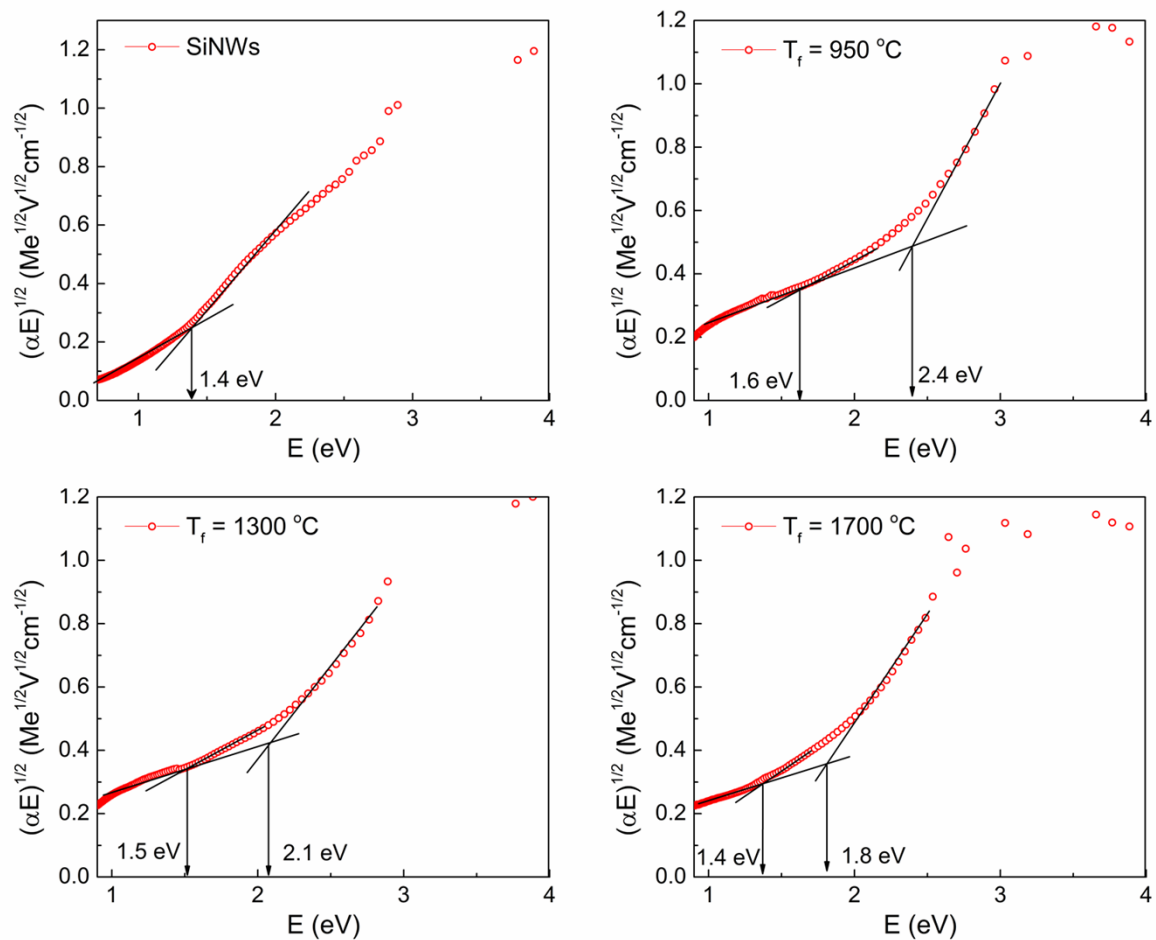

Figure S3 Tauc's plots of Si NWs, and Si/WO<sub>3</sub> core-shell NWs prepared at different  $T_f$ . The Tauc's plots of the Si/WO<sub>3</sub> core-shell NWs revealed the indirect optical band gap of both Si (lower energy) core and WO<sub>3</sub> (higher energy) shell.

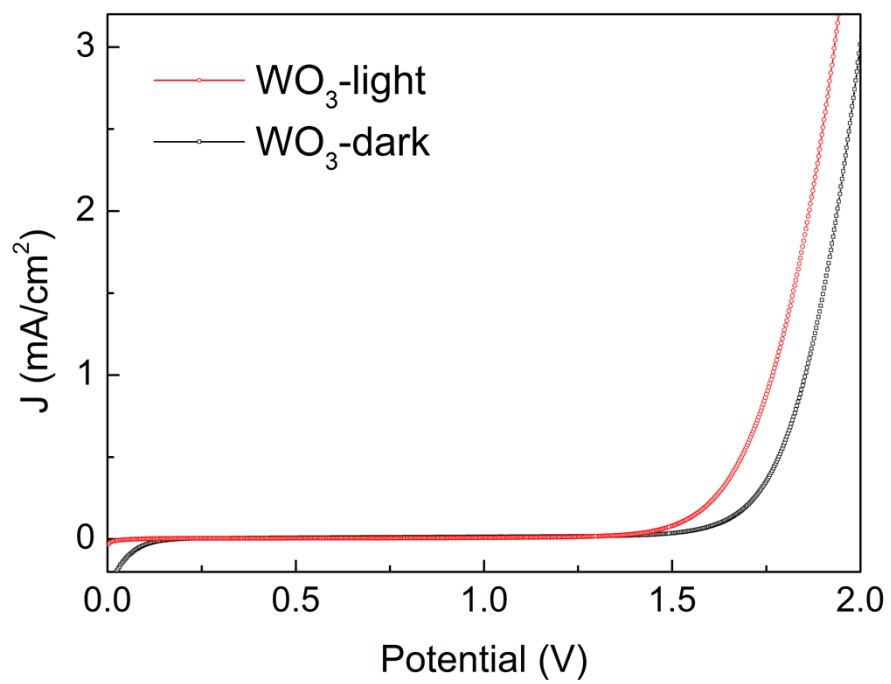

Figure S4 Typical current density versus potential plots of the WO<sub>3</sub> films under dark and illumination.

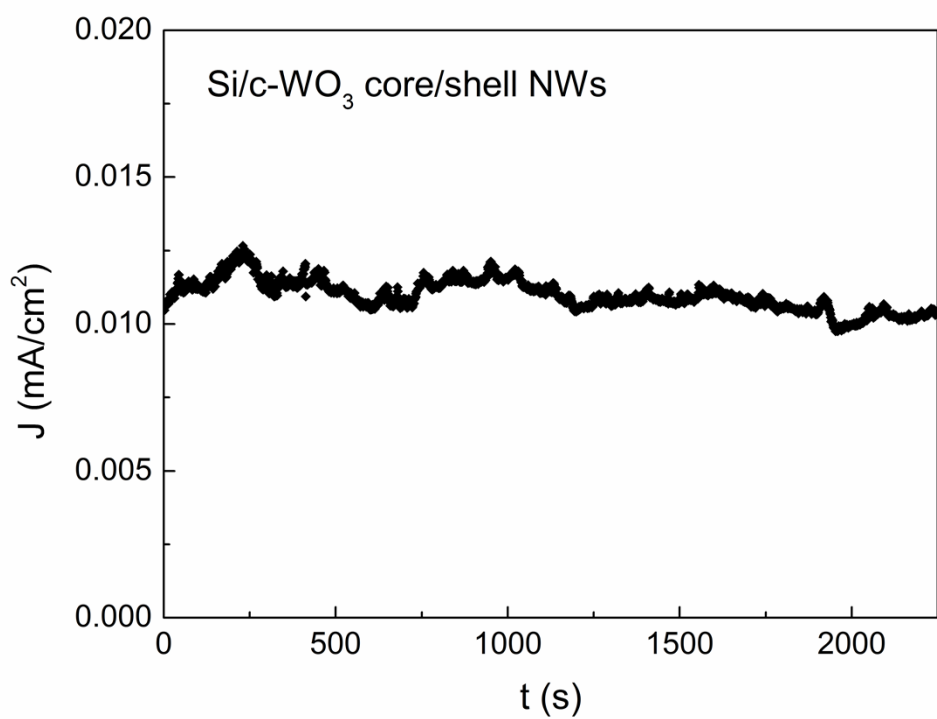

Figure S5 Photocurrent density versus time plot of the Si/crystalline WO<sub>3</sub> core-shell NWs.
